# Supplementary material for: Dual RNA-seq in Streptococcus pneumoniae Infection Reveals Compartmentalized Neutrophil Responses in Lung and Pleural Space
Source: PubMed Central journal article supplement (PMC6697439; doi:10.1128/msystems.00216-19), 2019-08-13
Supplement: mSystems.00216-19-sf001.pdf [file mSystems.00216-19-sf001.pdf]

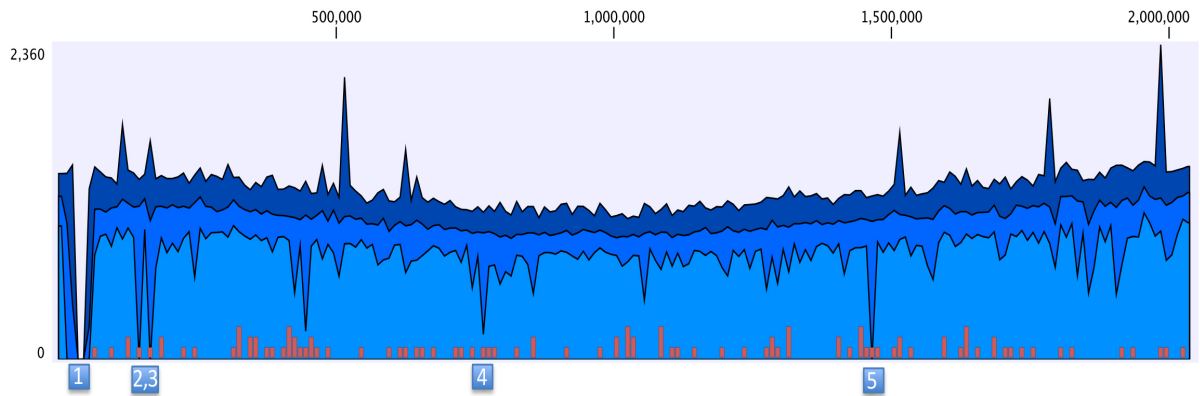

| N | Description of variation compared to OXC141 genome                                                                                                                                                                                                                                                          |
|---|-------------------------------------------------------------------------------------------------------------------------------------------------------------------------------------------------------------------------------------------------------------------------------------------------------------|
| 1 | 34kb deletion in SRL1 genome. Corresponds to putative pro-phage sequence. Sequence is entirely removed with cross mapped breakpoints at pro-phage insertion site.                                                                                                                                           |
| 2 | Deletion involving a non-coding region                                                                                                                                                                                                                                                                      |
| 3 | Poorly resolved area in highly repetitive region of PspA gene. Insufficient information to allow complete sequence to be determined.                                                                                                                                                                        |
| 4 | Presence of a full copy of the glutamine ABC transporter permease gene. OXC141 has a deletion in this gene. The 285 bp insertion sequence was reconstructed using reads unmapped to the reference sequence and matched with 100% sequence homology to several published pneumococcal genomes including D39. |
| 5 | 93 bp deletion in a peptide ABC transporter gene. Deletion is not present in any published pneumococcal sequences. Deletion is in-frame and affects the terminal region of the efflux pump. The functional consequence from this limited analysis is not clear.                                             |
