# Supplementary material for: Dual RNA-seq in Streptococcus pneumoniae Infection Reveals Compartmentalized Neutrophil Responses in Lung and Pleural Space
Source: PubMed Central journal article supplement (PMC6697439; doi:10.1128/msystems.00216-19), 2019-08-13

**A Upregulated**

Pleura

Lung

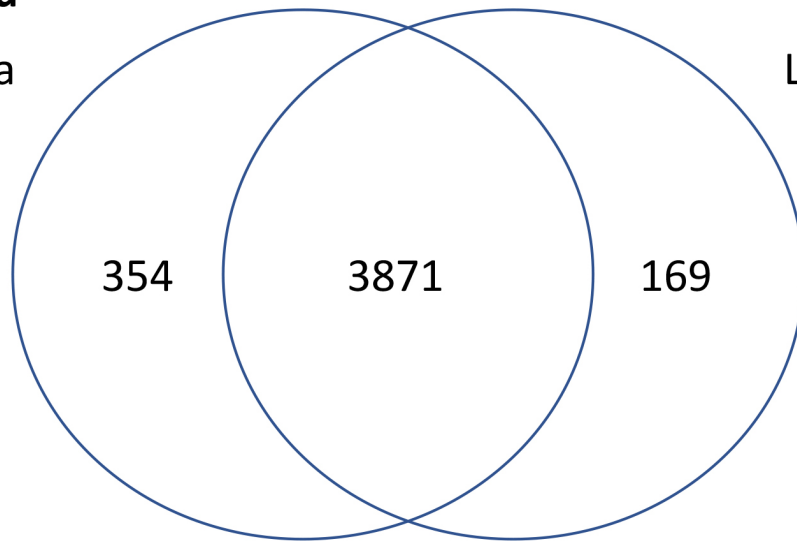

**B Downregulated**

Pleura

Lung

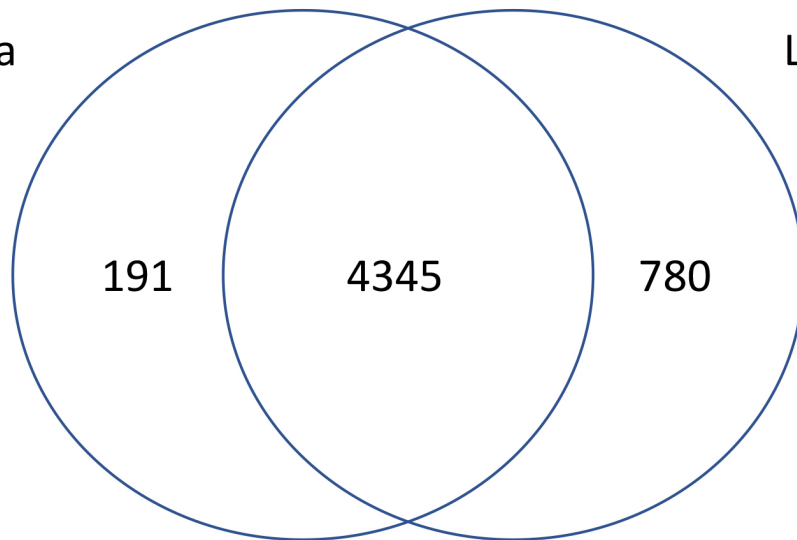

Supplement: mSystems.00216-19-sf003.pdf [file mSystems.00216-19-sf003.pdf]
